# Supplementary material
Source: PubMed Central journal article supplement (PMC3048120)
Supplement: 1016454108_pnas.1016454108_SI.pdf [file 1016454108_pnas.1016454108_SI.pdf]

# Supporting Information

Dray et al. 10.1073/pnas.1016454108

## SI Text

**Cytological Analyses of Protein Foci.** As expected, DMC1 and RAD51 foci were nearly exclusively associated with chromosome axes (colocalizing with SYCP3) and appeared throughout the nucleus in leptotema and zygotene, but were restricted to the unpaired X chromosome in early pachynema and completely disappeared by late pachynema (Fig. S7A–D). RAD51AP1 staining patterns were qualitatively different, but with some features in common with DMC1 staining. We observed five classes of RAD51AP1 nuclear staining patterns that appeared in a stage-specific manner. Class I foci are axis-associated, and class II foci are nuclear but not axis-associated (colocalizing only with DAPI) (Fig. S7A, *Inset*). Both classes were present throughout prophase I (Fig. S7A–D). Class III staining represents the substantial coating of synapsed regions that begins to appear in zygotene (Fig. S7B, *Inset*) and culminates in pachytene (Fig. S7C, *Inset*), when all autosomal bivalents are fully synapsed. In particular, much of the class III RAD51AP1 staining was coincident with the persistent DMC1 and RAD51 foci that are associated with the unsynapsed portion of the X (and to a lesser extent the Y) during pachytene. However, because class III staining was also observed in the nonhomologously synapsed regions at the zygotene-like stage in chromosome spreads from *Spo11*<sup>-/-</sup> males where no meiotic double-strand breaks (DSBs) are formed (Fig. S7F, *Inset*), we can infer this immunostaining pattern as being HR-independent and therefore unlikely to be informative about interactions of RAD51AP1 with DMC1. Class IV foci are large speckles that appeared both inside and outside of nuclei; when in the nucleus, they were rarely axis-associated (Fig. S7C, *Inset*). Because these foci occurred in all meiotic stages and were not diminished by treatment of the anti-RAD51AP1 antibodies with purified RAD51AP1 protein, we interpret them as non-specific background signal. Finally, class V represents a small number of bright axis-associated foci (typically 1–2) that were observed on most late pachytene bivalents (Fig. S7D, *Inset*). This is consistent with a role of RAD51AP1 at later stages of meiosis, but likely independent of its interactions with DMC1 and RAD51.

**Analysis of RAD51AP1-RAD51 Colocalization.** The cytological analysis to examine the colocalization of RAD51 with RAD51AP1 was conducted as described in the main text for DMC1-RAD51AP1 colocalization test, using 1:200 rabbit anti-RAD51 antibodies (Calbiochem, PC130). We performed rotation tests to verify the significance of the RAD51-RAD51AP1 colocalization results (Fig. S6E and F). We first rotated the RAD51 image and observed that the number of axis-associated foci decreased from  $64 \pm 17$  in the true images to  $14 \pm 5$  in the rotated images (Fig. S6I,  $P = 0.0004$ ). The spreads with the rotated RAD51AP1 channel displayed an average of  $65 \pm 16$  axis-associated RAD51AP1 foci, as compared to the  $84 \pm 18$  observed in the unrotated nuclei (Fig. S6I,  $P = 0.0131$ ). Importantly, before and after rotation of the RAD51AP1 image, the number of RAD51 foci colocalizing with RAD51AP1 decreased from  $30 \pm 9$  to  $7 \pm 2$  ( $P = 0.0004$ ).

## SI Materials and Methods.

**Purification of RAD51AP1 Mutants.** The L319Q and H329A mutant variants of maltose binding protein (MBP)-tagged RAD51AP1 isoform 2 were expressed in *Escherichia coli* and purified as described for the wild-type counterpart (Fig. 1B). Human RAD51 was purified as described previously (1).

**Affinity Pull-Down Experiments.** The affinity pull-down assay involving tagged RAD51AP1 isoforms and RAD51 was performed as described (2). Briefly, 4  $\mu$ g of each protein was incubated in 30  $\mu$ L of buffer A (50 mM Tris at pH 7.5, 1 mM DTT, 0.01% Igepal CA-630, 60 mM KCl) for 30 min at 4 °C before the reaction was mixed for 30 min at 4 °C with 8  $\mu$ L of Amylose-Sepharose resin (New England Biolabs) to immobilize RAD51AP1 via the MPB tag. After washing the beads twice with 200  $\mu$ L of the same buffer, bound proteins were eluted with 30  $\mu$ L of 2% SDS. The supernatant (S), wash (W), and SDS eluate (E), 8  $\mu$ L each, were analyzed by 12% SDS-PAGE and Coomassie blue staining.

**Determination of Antibody Specificity.** In order to determine the specificity of the antibodies used in the cytological analyses, we incubated the anti-RAD51, anti-DMC1, and anti-RAD51AP1 antibodies (2.5  $\mu$ g) with their cognate protein antigen (12.5  $\mu$ g RAD51AP1 or 6.4  $\mu$ g of either RAD51 or DMC1) for 30 min in 100  $\mu$ L before use. In the case of the anti-RAD51 and anti-DMC1 antibodies, the treatment specifically abolished the ability of the antibody preparations to reveal foci of their cognate target (Fig. S7D and E). In the case of the anti-RAD51AP1 antibodies, we found that all classes of RAD51AP1 foci disappeared subsequent to such treatment except the class IV foci that we consider to be nonspecific (Fig. S7A and B). Because the purified proteins used to titrate out the antibodies had not undergone any denaturation treatment, we infer that the antibodies used recognize the native form of their cognate protein antigen. As expected, the preimmune RAD51AP1 serum did not produce any protein foci (Fig. S7C).

**DNA Substrates.** The following oligonucleotides (Integrated DNA Technologies) were used in the DNA mobility shift assay: P1 and P2 for ssDNA and dsDNA; D1, D2, and D3 to prepare the synthetic D-loop structure (see Table S2). DNA was labeled, annealed, and purified as previously described (1).

**DNA Mobility Shift Assay.** The sequences of the oligonucleotides (Integrated DNA Technologies) used in substrate construction are listed in Table S2. Labeling of DNA and the DNA mobility shift assay with the ssDNA, dsDNA, and D-loop substrates (30 nM each) was carried out as described in our published study (2).

**RT-PCR.** Juvenile mice were sacrificed at 5, 15, and 21 d post partum (dpp) to obtain testis-specific RNA with an RNeasy Mini kit (Qiagen). *Spo11*<sup>-/-</sup> mice at 21 dpp were also sacrificed to obtain testis-specific RNA with the same method. The SuperScript One-Step RT-PCR kit (Invitrogen) was used to synthesize cDNA and to amplify the *RAD51AP1* transcript. Four primers were used to detect overlapping regions of the mouse *RAD51AP1* transcript (RT1 to RT4; see Table S2 and Fig. S6A). RT-PCR products were analyzed in a 1% agarose gel run in TAE buffer (40 mM Tris acetate, pH 7.4, 2 mM EDTA) and stained with ethidium bromide. DMC1 and  $\beta$ -actin primers were included as positive controls. Each primer pair set also included a minus (–) reverse transcriptase reaction to ensure that there was no genomic DNA contamination.

**Western Blotting.** Whole cell lysates were prepared from mouse testes (with tunica albuginea removed) by sonication in lysis buffer (60 mM Tris-HCl, pH 6.8, 2% SDS, 10% glycerol, 50 mM dithiothreitol) and resolved by 10% SDS-PAGE. Proteins were transferred to a nitrocellulose membrane for Western analyses.

For RAD51AP1 detection, the nitrocellulose blot was probed with the polyclonal guinea pig antibody GP49, and then with goat anti-guinea pig IgG-HRP (sc-2438, Santa Cruz) as the secondary antibody. For DMC1 and  $\beta$ -actin detection, goat polyclonal anti-DMC1 antibody (sc-8973, Santa Cruz) or mouse monoclonal anti- $\beta$ -actin antibody (A5316, Sigma) was used as the primary antibody, and either donkey anti-goat IgG-HRP (sc-2020, Santa

Cruz) or goat anti-mouse IgG-HRP (sc-2005, Santa Cruz) was used as the secondary antibody.

**Immunofluorescence.** The immunolocalization of RAD51AP1 with RAD51 was conducted as described in the main text, except that 1:200 rabbit anti-RAD51 antibody (Calbiochem, PC130) was used to detect RAD51.

1. Sigurdsson S, Trujillo K, Song B, Stratton S, Sung P (2001) Basis for avid homologous DNA strand exchange by human Rad51 and RPA. *J Biol Chem* 276:8798–8806.

2. Wiese C, et al. (2007) Promotion of homologous recombination and genomic stability by RAD51AP1 via RAD51 recombinase enhancement. *Mol Cell* 28:482–490.

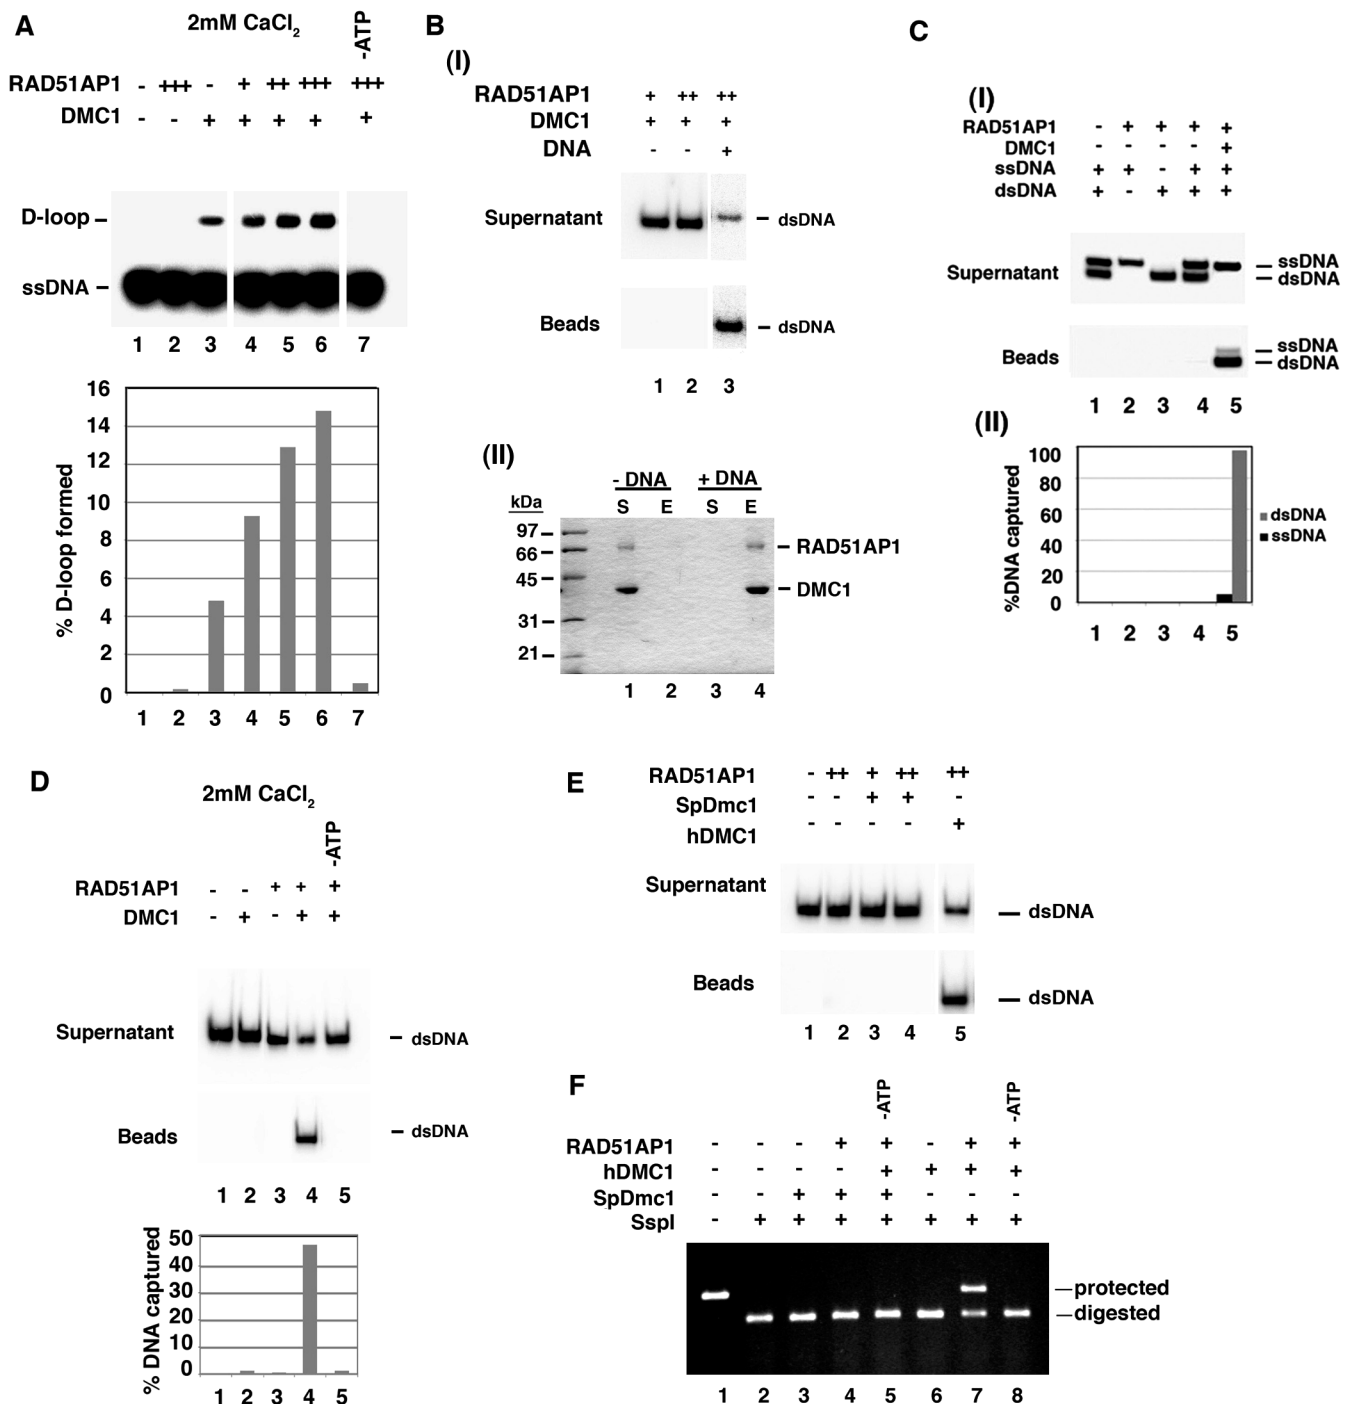

**Fig. S1. GST-tagged RAD51AP1 isoform 2 functionally synergizes with the stabilized DMC1 presynaptic filament but not with the SpDmc1 filament.** (A) The D-loop reaction was conducted with RAD51AP1 (200, 300, and 500 nM) and 2 mM CaCl<sub>2</sub> to stabilize the DMC1 presynaptic filament. The results were plotted. (B) (I) shows that duplex DNA capture did not occur if ssDNA was omitted from the magnetic beads (lanes 1 and 2); a positive control (lane 3) was included. The amount of RAD51AP1 was 300 or 600 nM. (II) shows that DMC1 and RAD51AP1 were retained on the magnetic beads when ssDNA was present (+DNA; lanes 3 and 4) but not when the DNA was omitted (-DNA; lanes 1 and 2). The beads were treated with SDS, and the eluate fraction (designated as E) was analyzed along with the supernatant (designated as S). (C) When presented with both ssDNA and dsDNA, DMC1 and RAD51AP1 (900 nM) captured the dsDNA preferentially (lane 5). The appropriate controls were included. The results were quantified and plotted (II). (D) Duplex capture was examined with RAD51AP1 (300 nM) in the presence of 2 mM CaCl<sub>2</sub>. The results were plotted. (E and F) Results showing that RAD51AP1 did not synergize with SpDmc1 in duplex capture (E) or synaptical complex assembly (F). The amount of RAD51AP1 was 300 or 600 nM in E and 500 nM in F.

















**Table S1. Conservation of RAD51AP1 isoforms among vertebrates**

| Organism   | Isoform 1 | Isoform 2 | Isoform 3 |
|------------|-----------|-----------|-----------|
| Human      | 352       | 335       | 302       |
| Chimpanzee | 352       | 335       | 302       |
| Gorilla    | 352       | —         | —         |
| Dog        | 354       | —         | —         |
| Rock Hyrax | 353       | —         | —         |
| Bat        | 349       | —         | —         |
| Horse      | —         | 330       | —         |
| Cow        | —         | 329       | —         |
| Chicken    | —         | 346       | —         |
| Pig        | —         | 340       | —         |
| Rat        | —         | 337       | —         |
| Mouse      | —         | 337       | —         |
| Tarsier    | —         | 327       | —         |
| Frog       | —         | 331       | —         |

The various isoforms of RAD51AP1 were retrieved from [www.ensembl.org](http://www.ensembl.org) and determined to be homologous to the human isoforms 1, 2, or 3 by sequence alignment. Numbers refer to total number of amino acid residues, i.e., 352 for 352 residues.

**Table S2. Oligonucleotides used in this study**

| Name   | Sequence                                                                                                        | Nature           | Assay                   |
|--------|-----------------------------------------------------------------------------------------------------------------|------------------|-------------------------|
| P1     | 5'-TTATATCCTTTACTTTGAATTCTATGTTTAAACCTTTTACTTATTTTTGTATTAGCCGG<br>ATCCTTATTCAATTATGTTTCAT-3'                    | ssDNA            | Duplex capture,<br>EMSA |
| P2     | 5'-ATGAACATAATTGAAATAAGGATCCGGCTAATACAAAATAAGTAAAAGGTTAAA<br>CATAGAATTCAAAGTAAAGGATATAA-3'                      | dsDNA            | Duplex capture,<br>EMSA |
| D1     | 5'-GCCGTGTCACCTGGATCAGAGGTCACCTGGCAAGGATGGCCCGTCCGTAGCACCAG<br>GACACCCTAGTTAGCTCCGACATGTCGTACATATCGGATGCTGGC-3' |                  |                         |
| D2     | 5'-GCCAGCATCCGATATGTACGACATGTCGGAAATTAAGATGCAGCTTGAAACTAA<br>CCATTTCTACTGGATGCCAAGTGACCTCTGATCCAGTGACACGGC-3'   |                  |                         |
| D3     | 5'-TATGATTAGTCTAGGATTCTATTATCTATTAATGCTAGTGCCTAACTAGGGTGCCT<br>GGTGCTACGGACGGCCATCCTT-3'                        | D-loop substrate | EMSA                    |
| Sspl   | 5'-AATGTTGAATACTCATACTCTTCTTTTCAATATTATTGAAGCATTATC<br>AGGGTTATT-3'                                             | homologous       |                         |
| AflIII | 5'-CAGAATCAGGGGATAACGCAGGAAAGAACATGTGAGCAAAGGCCAGC<br>AAAAGCCAGGA-3'                                            | heterologous     | Synaptic assay          |
| RT1    | 5'-ATGGTGCGTCCTACCAGAAATAGAAAACCA-3'                                                                            |                  |                         |
| RT2    | 5'-TACTTGGTTGGTGAGTGTGGAAAGTTCCTT-3'                                                                            |                  |                         |
| RT3    | 5'-GTTGCCCTGGCTTTATCTGTGAAGGAAC-3'                                                                              |                  |                         |
| RT4    | 5'-CCGCACTTGGCTGCTTGTGG-3'                                                                                      |                  | RT-PCR                  |
